# Supplementary material
Source: PubMed Central journal article supplement (PMC2896765)
Supplement: mmc1.pdf [file mmc1.pdf]

The American Journal of Human Genetics, Volume 87

**Supplemental Data**

**Mesomelia-Synostoses Syndrome Results**

**from Deletion of *SULF1* and *SLCO5A1* Genes at 8q13**

Bertrand Isidor, Olivier Pichon, Richard Redon, Debra Day-Salvatore, Antoine Hamel, Karolina A. Siwicka, Maria Bitner-Glindzicz, Dominique Heymann, Lena Kjellén, Cornelia Kraus, Jules G. Leroy, Geert R. Mortier, Anita Rauch, Alain Verloes, Albert David, and Cédric Le Caignec

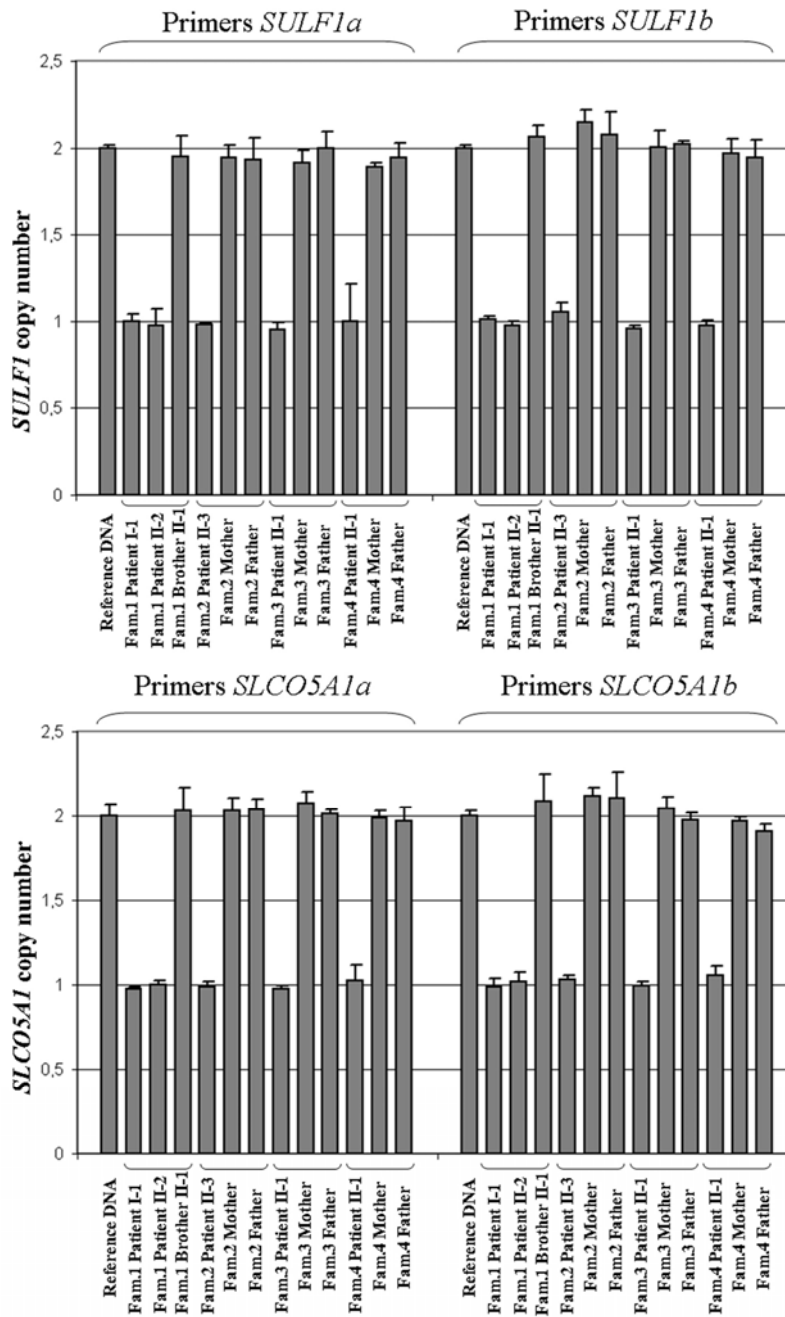

**Figure S1. Real-time quantitative PCR (qPCR) results for *SULF1* and *SLCO5A1*.** qPCR results showing the copy number for the *SULF1* gene and the *SLCO5A1* gene in the patients, their parents and the controls. The number of alleles present was quantified with the comparative threshold cycle (dCt) method with *ALBUMIN* as reference gene. Each reaction was performed in triplicate. The sequences of the primers used are given in Supplementary Table 3. Fam.: family.

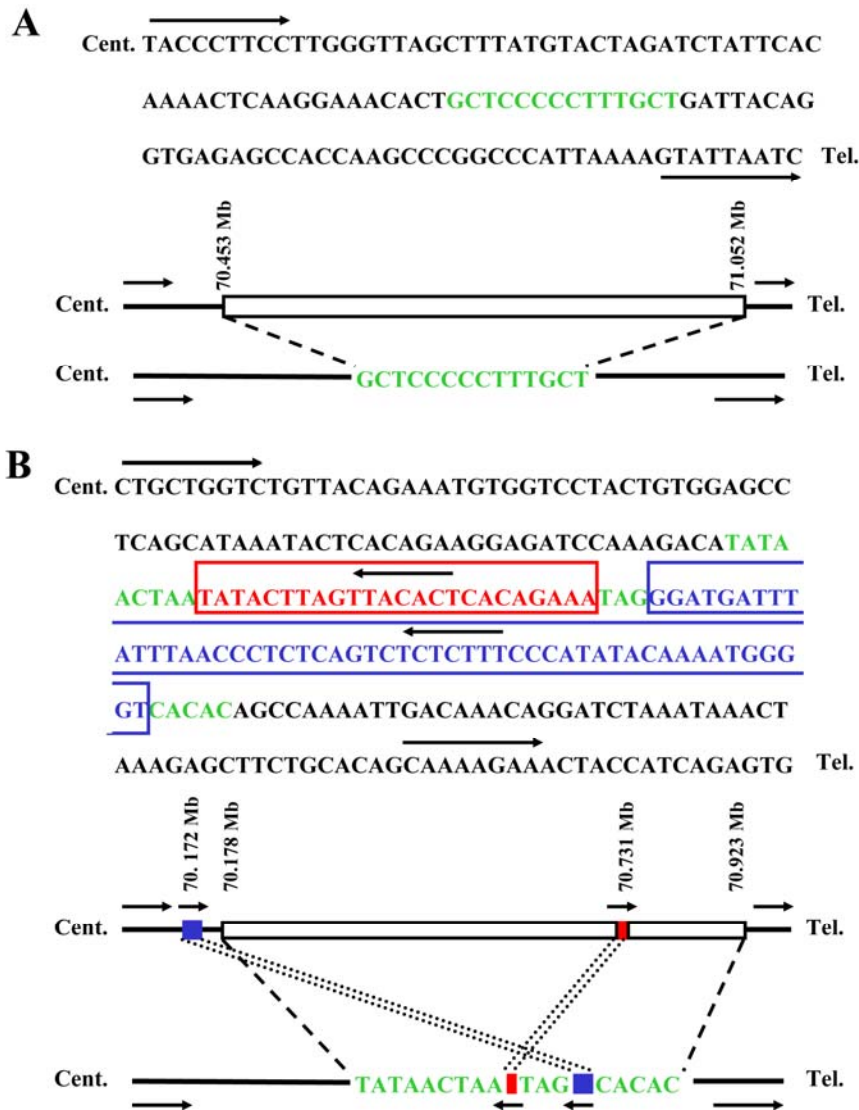

**Figure S2. Results of breakpoint sequencing.**

Panel A. Sequence data for the deletion junction in patient II-1 in family 4. The 607 Kb deletion may have been mediated by non-homologous end joining (NHEJ) with the additional bases GCTCCCCCTTTGCT bridging the breakpoints (depicted in green). Panel B. Sequence data for the junction of the 744 Kb deletion in patient II-2 in family 1. Sequence analysis of breakpoint junctions revealed sequence complexity. A 553 Kb deletion is followed by a 24 bp segment with no copy-number change (depicted in red), a 52 bp segment with no copy-number change (depicted in blue) and a 191 Kb deletion. The additional bases of unknown origin are depicted in green. Black boxes indicate the deleted regions. Arrowheads show direction of DNA relative to the positive strand. Figure is not drawn to scale and approximate positions are given in megabases (Mb) (hg18). Cent.: centromeric position; tel.: telomeric position.

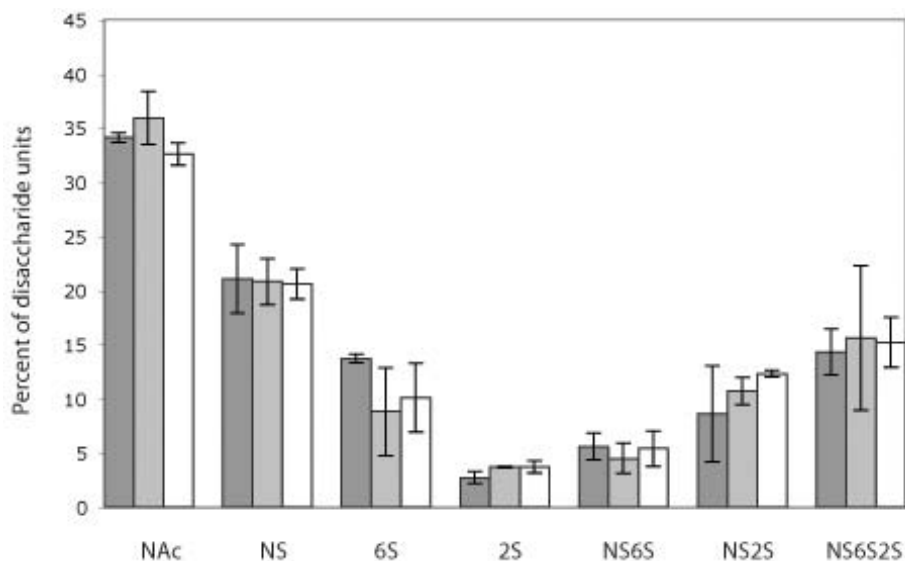

**Figure S3. Disaccharide composition of heparan sulfate recovered from the urine of patient II-2 of Family 1.**

Heparan sulfate purified from 10 ml samples of urine from two healthy controls and patient II-2 of family 1 were subjected to disaccharide compositional analyses by reversed phase ion pairing-HPLC after digestion with heparinase I, II and III (Ledin J, Staatz W, Li JP, Götte M, Selleck S, Kjellén L, Spillmann D.(2004) J Biol Chem. 279, 42732-42741). Two samples from control 1 (dark grey staples) and three samples from control 2 (light grey staples) and patient II-2, family 1 (white staples) were analyzed. Average values +/- standard deviation are shown.

Non-sulfated disaccharide: **NAc** (HexA-GlcNAc);

Monosulfated disaccharides: **NS** (HexA-GlcNS), **6S** (HexA-GlcNAc(6OS)),

**2S** (HexA(2OS)-GlcNAc);

Disulfated disaccharides: **NS6S** (HexA-GlcNS(6OS), **NS2S** (HexA(2OS)-GlcNS);

Trisulfated disaccharide: **NS6S2S** (HexA(2OS)-GlcNS(6OS));

where HexA is hexuronic acid, GlcNAc is *N*-acetyl-glucosamine and GlcNS is *N*-sulfated glucosamine.

**Table S1. Types of Agilent Human Genome CGH oligonucleotide array used in the present study.**

|                                     | Pangenomic 44K | Pangenomic 400K |
|-------------------------------------|----------------|-----------------|
| Fam.1 ; Patient I-1                 |                | X               |
| Fam.1 ; Individual I-2              | X              |                 |
| Fam.1 ; Individual II-1             | X              |                 |
| Fam.1 ; Patient II-2                |                | X               |
| Fam.2; Individual I-1               | X              |                 |
| Fam.2; Individual I-2               | X              |                 |
| Fam.2 ; Patient II-3                |                | X               |
| Fam.3; Individual I-1               | X              |                 |
| Fam.3; Individual I-2               | X              |                 |
| Fam.3 ; Patient II-1                |                | X               |
| Fam.4; Individual I-1               | X              |                 |
| Fam.4; Individual I-2               | X              |                 |
| Fam.4 ; Patient II-1                |                | X               |
| Patient K1 with Kantaputra syndrome | X              |                 |
| Patient K2 with Kantaputra syndrome | X              |                 |

**Table S2. 400K array CGH results for the 8q13 deletions.**

|                                                  |                                                  | Fam.1<br>Patient I-1 | Fam.1<br>Patient II-2 | Fam.2<br>Patient II-3 | Fam.3<br>Patient II-1 | Fam.4<br>Patient II-1 |
|--------------------------------------------------|--------------------------------------------------|----------------------|-----------------------|-----------------------|-----------------------|-----------------------|
| Last normal copy-number probe (centromeric side) | Agilent probe reference                          | A_16_P18342627       | A_16_P18342627        | A_18_P16520270        | A_16_P18342932        | A_16_P38436215        |
|                                                  | Physical position of the probe (start-end)(hg18) | 70176105-70176164    | 70176105-70176164     | 70337713-70337772     | 70309160-70309219     | 70442152-70442210     |
| First deleted probe (centromeric side)           | Agilent probe reference                          | A_16_P38435619       | A_16_P38435619        | A_16_P38436025        | A_18_P16521930        | A_16_P18343273        |
|                                                  | Physical position of the probe (start-end)(hg18) | 70179295-70179354    | 70179295-70179354     | 70353405-70353464     | 70326013-70326072     | 70453476-70453535     |
| Last deleted probe (telomeric side)              | Agilent probe reference                          | A_16_P18344511       | A_16_P18344511        | A_16_P18344545        | A_16_P18344511        | A_14_P126822          |
|                                                  | Physical position of the probe (start-end)(hg18) | 70917620-70917679    | 70917620-70917679     | 70935409-70935468     | 70917620-70917679     | 71052720-71052779     |
| First normal copy-number probe (telomeric side)  | Agilent probe reference                          | A_16_P01937896       | A_16_P01937896        | A_16_P18344553        | A_16_P01937896        | A_16_P18344798        |
|                                                  | Physical position of the probe (start-end)(hg18) | 70926798-70926857    | 70926798-70926857     | 70944715-70944774     | 70926798-70926857     | 71083900-71083959     |
| Minimum size of the deletion (in Kb)             |                                                  | 738 Kb               | 738 Kb                | 582 Kb                | 591 Kb                | 599 Kb                |
| Maximum size of the deletion (in Kb)             |                                                  | 750 Kb               | 750 Kb                | 607 Kb                | 617 Kb                | 641 kb                |

**Table S3. Real-time quantitative PCR (qPCR) assays.**

Primer sequences and PCR conditions for *SULF1*, *SLCO5A1* and the reference gene *ALB*

| oligo        | forward primer         | reverse primer         | physical position (Hg19) | amplicon size (bp) | annealing temperature |
|--------------|------------------------|------------------------|--------------------------|--------------------|-----------------------|
| ALB          | GCTGTCATCTCTTGTGGGCTGT | AAACTCATGGGAGCTGCTGGTT | chr4:74284555-74284695   | 141                | 59                    |
| SULF1intr1   | CCCCAAGAAATGGTCACTA    | CAGGCAAGACTGCCCTAGAC   | chr8:70245160-70245287   | 128                | 59                    |
| SULF1ex6     | CCACCTTCATCAATGCCTTT   | GGGAAGAGCAGTTCTCGTTG   | chr8:70650811-70650930   | 120                | 59                    |
| SLCO5A1intr5 | CCATGCCAACCATAAAAAAG   | GGGAAGGGAGAGAATTTTGC   | chr8:70649951-70650064   | 114                | 59                    |
| SLCO5A1intr2 | GGGTCCTATGGGTTGACCTT   | CCCTGTTGGGTTTTTGTGAT   | chr8:70684188-70684351   | 164                | 59                    |

**Table S4. Real-time quantitative RT-PCR assays.**

Primer sequences and PCR conditions for *SULF1* and *SLCO5A1*. Two different reference genes, *GAPDH* and *HPRT1*, have been used for the study.

| oligo         | forward primer        | reverse primer           | amplicon size (bp) | annealing temperature |
|---------------|-----------------------|--------------------------|--------------------|-----------------------|
| SULF1-ex22-24 | GAGCTCAGAAGCTGTCAAGGA | AGACGGGGCTGATTAACCTT     | 138                | 60                    |
| SLCO5A1-ex7-8 | TGAGCCAGTCTGTGGATCAG  | ATCACTTGGCGACTTTGGAC     | 132                | 60                    |
| GAPDH         | GTGAAGGTCGGAGTCAACG   | TGAGGTCAATGAAGGGGTC      | 112                | 60                    |
| HPRT1         | GCCAGACTTTGTGGATTTG   | CTCTCATCTTAGGCTTTGTATTTG | 114                | 60                    |

**Table S5. *SULF1* and *SLCO5A1* sequencing performed on two patients with mesomelic dysplasia, Kantaputra type.**

No deleterious mutations were identified in both patients. Variants were identified in patient K1 (Siwicka et al.) (one variant in intron 10 of *SULF1*: rs1155965) and in patient K2 (Shears et al.) (two variants located in the 3'UTR of *SULF1*: rs1441204 in exon 2 and rs13264163 in exon 3 and one variant in exon 2 of *SLCO5A1*: rs3750266 in exon 2).

|                 | oligo                       | forward primer         | reverse primer         | physical position (Hg19) | amplicon size (bp) | annealing temperature |
|-----------------|-----------------------------|------------------------|------------------------|--------------------------|--------------------|-----------------------|
| SLCO5A1         | SLC2aF/SLC2aR               | AGGTGGGCAAGACTGACTG    | GACCACGTAGAGGCACCTTC   | chr8:70744541-70745015   | 478                | 60                    |
|                 | SLC2a2F/SLC2a2R             | AGCAAAACCTTCTCGGTGTC   | AGCCACGTAGACCCAGTGAT   | chr8:70744115-70744606   | 492                | 60                    |
|                 | SLC2a3F / SLC 2a3R          | CCCCTACCAGATCCAAGAGT   | ACAGCAAGGCTAAAACGTAAAA | chr8:70743858-70744250   | 393                | 60                    |
|                 | SLC3F / SLC 3R              | AAGGGCAAGCTTCAAAACC    | GACGTAGCTTTCTTTGGGATG  | chr8:70673814-70674287   | 451                | 60                    |
|                 | SLC4F / SLC 4R              | TTTGCTCAACTTCTACTGCTT  | ACAGTGGGTAGACAGCATGG   | chr8:70667569-70668019   | 451                | 60                    |
|                 | SLC5F / SLC 5R              | GGATGGTTTCTAATCGTCATCA | TCCAGGATTTCTCTCTCTA    | chr8:70650123-70650598   | 476                | 60                    |
|                 | SLC6aF / SLC 6aR            | TCTGGATGTGAGTCCGTTGT   | AGATGCACAAAACCCACAGG   | chr8:70617196-70617659   | 464                | 60                    |
|                 | SLC7F / SLC7R               | GGCTTTGATTCATGGGAAG    | TTGGAGCCTCTGAAAAGAAA   | chr8:70594307-70594699   | 393                | 60                    |
|                 | SLC8F / SLC 8R              | TTAGCTTTGAGGGGCACA     | TTACAACCTTTCTTCCCTTCC  | chr8:70591422-70591901   | 480                | 60                    |
|                 | SLC9F / SLC9R               | CAAAGCCGACTTGATTTGAC   | CAAACAACAGAACCTGTCAGC  | chr8:70588661-70588986   | 326                | 60                    |
| SLC10F / SLC10R | CCTCCCCTCAACTGGTTTAA        | CTTTTTGCAGGCCAGTCTCT   | chr8:70585215-70585672 | 458                      | 60                 |                       |
| SULF1           | SULF1-6F / SULF1-6R         | ATTTGTAGCCCTTCTCTGC    | TAGGGTGTGGTTAATGTGC    | chr8:70476068-70476504   | 437                | 58                    |
|                 | SULF1-7F / SULF1-7R         | ACAATCGAAATAGGCATTCA   | CATGACACTTCTTCTGAGTCT  | chr8:70488143-70488513   | 371                | 58                    |
|                 | SULF1-8F / SULF1-8R         | CCGTCTCTTTTCAAGTCATAA  | TAGAAAGCCAATCTTGTGGA   | chr8:70498500-70498843   | 344                | 58                    |
|                 | SULF1-9F / SULF1-9R         | TGAATTGCTTCTGAGGAAAG   | TGAAGAAAGCCTTGTGGATA   | chr8:70501117-70501494   | 378                | 58                    |
|                 | SULF1-10F / SULF1-10R       | CACAACCTCGAGATATTTCC   | CTGGGCCAAAACACTACT     | chr8:70512766-70513030   | 265                | 58                    |
|                 | SULF1-11F / SULF1-11R       | GTGGCAACACTATTGAGCAT   | TCGAAATTAACCAGCCTACA   | chr8:70513819-70514199   | 381                | 58                    |
|                 | SULF1-12F / SULF1-12R       | AGAAAAAGCAGCCCTAAGTG   | TTCACAAGCAGCTGAGAAAT   | chr8:70515357-70515705   | 349                | 58                    |
|                 | SULF1-13F / SULF1-13R       | AAATAAGCTGTAGCACAGATCC | AAATACTCAGCAGGAAAGC    | chr8:70515761-70515960   | 200                | 58                    |
|                 | SULF1-14F / SULF1-14R       | GGAGTCATGTGACAGGGTAA   | GAGGTGTCTCAGTGAGCTTG   | chr8:70516941-70517312   | 372                | 58                    |
|                 | SULF1-15F / SULF1-15R       | AATAACACCTGGAGCAGAATC  | GCAACCCTTTCGTCTCTA     | chr8:70533220-70533564   | 345                | 58                    |
|                 | SULF1-16F / SULF1-16R       | TCACCTTCTCCCTTGTAAGC   | CCAAGTGCAAAATGGTGATA   | chr8:70536114-70536515   | 402                | 58                    |
|                 | SULF1-17F / SULF1-17R       | CAATATTTCCATTGATGCTG   | GTATGTCCCACCAGACACAG   | chr8:70539290-70539624   | 335                | 58                    |
|                 | SULF1-18F / SULF1-18R       | ACAGAACAGAGAAAACAAGGTG | GCTAATGCCTCTGGCTTGT    | chr8:70539918-70540167   | 250                | 58                    |
|                 | SULF1-19F / SULF1-19R       | CAATGCAAGGCTATGAAGTC   | GCACTGCAGGAAACACAGG    | chr8:70540361-70540569   | 209                | 58                    |
|                 | SULF1-20-2F / SULF1-20-2R   | TCACAGCAACAAGCCTATTT   | TTATGAGTCGCTGTCTCTGC   | chr8:70541666-70541973   | 321                | 58                    |
|                 | SULF1-21+22F / SULF1-21+22R | CCTGCCTAAGGTTTTCACT    | AGGCAGAAAAGCTCAGTAACA  | chr8:70550680-70551162   | 483                | 58                    |
|                 | SULF1-23F / SULF1-23R       | TGCATTTGAACCTAATAGGAA  | CTCTGTGCAACACGGTAAGA   | chr8:70552877-70553176   | 300                | 58                    |
|                 | SULF1-24_1F / SULF1-124_1R  | GAGGGGAAAATGCTTTTGAG   | CAACCTTATGCCTTGGGTCT   | chr8:70570615-70571080   | 466                | 58                    |
